# Supplementary material for: Cellulose citrate: a convenient and reusable bio-adsorbent for effective removal of methylene blue dye from artificially contaminated water
Source: Royal Society of Chemistry journal article supplement (doi:10.1039/d1ra05464c), 2021-01-01
Supplement: d1ra05464c1.pdf [file d1ra05464c1.pdf]

## Electronic Supplementary Information (ESI)

### Cellulose Citrate: a Convenient and Reusable Bio-adsorbent for Effective Removal of Methylene Blue Dye from Artificially Contaminated Water

*Fabrizio Olivito,<sup>\*1</sup> Vincenzo Algieri,<sup>\*1</sup> Antonio Jiritano,<sup>1</sup> Matteo Antonio Tallarida,<sup>1</sup> Antonio Tursi,<sup>2</sup> Paola Costanzo,<sup>1</sup> Loredana Maiuolo<sup>1</sup> and Antonio De Nino<sup>\*1</sup>*

*Corresponding authors email addresses*

[fabrizio.olivito@unical.it](mailto:fabrizio.olivito@unical.it), [vincenzo.algieri@unical.it](mailto:vincenzo.algieri@unical.it), [denino@unical.it](mailto:denino@unical.it)

|                            |   |
|----------------------------|---|
| Adsorption kinetics.....   | 2 |
| Adsorption isotherms ..... | 3 |
| Equations.....             | 4 |

## Adsorption kinetics

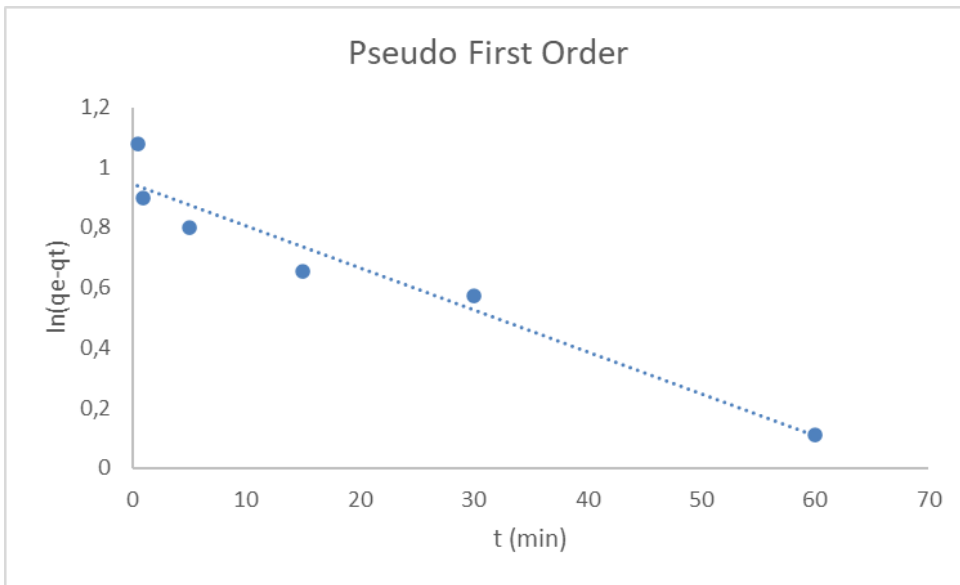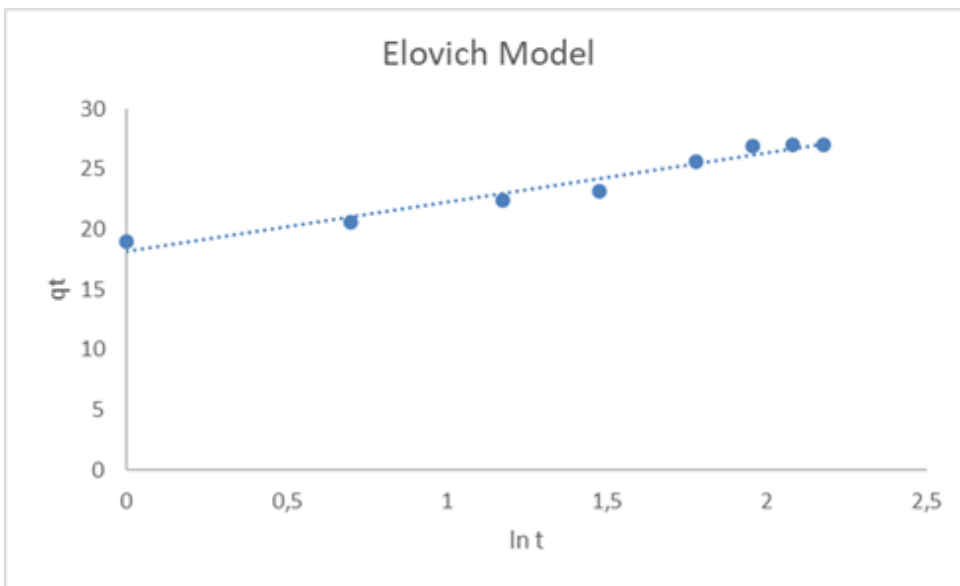

Fig. S1 Pseudo first order and Elovich model plots

## Adsorption isotherms

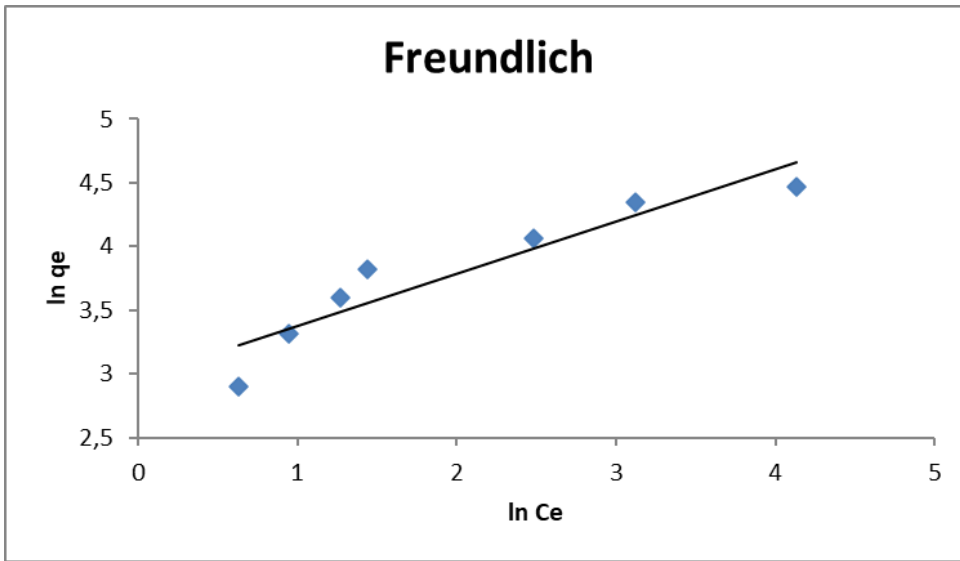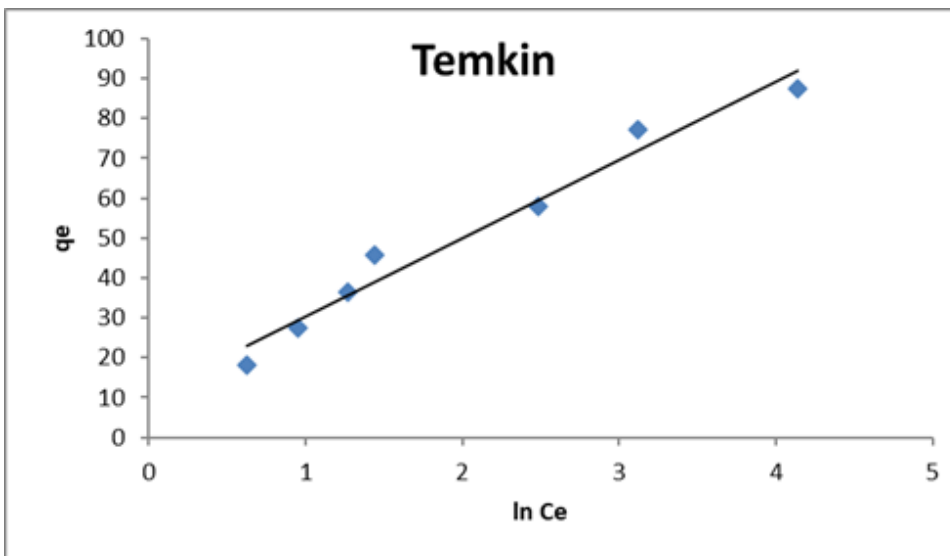

Fig. S2 Freundlich and Temkin isotherms plots

## Equations

Different equations used in the study:

$$\text{Pseudo – first order equation: } \ln(q_e - q_t) = \ln q_e - k_1 t \quad (1)$$

$$\text{Pseudo – second order equation: } t/q_t = 1/k_2 q_e^2 + (1/q_e)t \quad (2)$$

$$\text{Elovich equation: } q_t = \frac{1}{\beta} \ln(\alpha\beta) + \frac{1}{\beta} \ln t \quad (3)$$

Where,  $q_e$  and  $q_t$  are the amounts of dye adsorbed on cellulose-citrate (mg/g) at equilibrium and at time  $t$ .  $k_1$  ( $\text{min}^{-1}$ ) and  $k_2$  ( $\text{g/mg/min}$ ) are the pseudo-first order rate constant and the pseudo-second-order rate constant.  $\alpha$  ( $\text{mg g}^{-1} \text{min}^{-1}$ ) is the initial adsorption rate and  $\beta$  ( $\text{g mg}^{-1}$ ) is the relationship between the degree of surface coverage and the activation energy involved in the chemisorption.

$$\text{van't Hoff equation: } \ln K_c = \frac{\Delta S^\circ}{R} - \frac{\Delta H^\circ}{RT} \quad (4)$$

where,  $\Delta S^\circ$ ,  $\Delta H^\circ$  and  $R$  represent entropy change, enthalpy change and the universal gas constant ( $8.314 \text{ J/mol K}$ ) respectively.  $T$  (K) is the absolute temperature and  $K_c$  (L/g) is the standard thermodynamic equilibrium constant, which is expressed by

$$K_c = \frac{q_e}{C_e} \quad (5)$$

where,  $q_e$  is the amount of adsorbed MB dye per unit mass of adsorbent at equilibrium (mg/g) and  $C_e$  is the equilibrium aqueous concentration of MB.

Further, the value of the Gibbs free energy change  $\Delta G^\circ$  (J/mol) is calculated as:

$$\Delta G^\circ = -RT \ln K_c \quad (6)$$

The negative value of  $\Delta G^\circ$  indicates the spontaneity of a chemical reaction.

$$\text{Langmuir isotherm: } \frac{C_e}{q_e} = \frac{1}{k_L q_m} + \frac{1}{q_m} C_e \quad (7)$$

$$\text{Freundlich isotherm: } \ln q_e = \ln k_F + \frac{1}{n} \ln C_e \quad (8)$$

$$\text{Tempkin isotherm: } q_e = \beta \ln k_T + \beta \ln C_e \quad [\text{where, } \beta = RT/b] \quad (9)$$

where the Langmuir constants  $q_m$  and  $k_L$  represent the maximum adsorption capacity of the adsorbent and the constant energy related to the heat of adsorption, while  $C_e$  (mg/L) is the concentration of adsorbate in the liquid phase at equilibrium and  $q_e$  (mg/g) is the amount of adsorbate adsorbed on the solid phase at equilibrium.  $k_F$  (mg/g) ( $\text{L/mg}$ )<sup>1/n</sup> indicates the adsorption capacity, and  $n$  reflects the intensity of adsorption according to the Freundlich theory. The constant  $\beta$  (L/mg) is related to the heat of adsorption,  $k_T$  (mg/L) is a constant of the Tempkin isotherm,  $b$

(J/mol) is the energy constant of the Tempkin isotherm, R (8.314 J/K mol) is the gas constant and T (K) is the absolute temperature.

One of the essential characteristics of the Langmuir isotherm can be expressed by a dimensionless constant, separation factor,  $R_L$ , defined as follows:

$$R_L = \frac{1}{1 + k_L C_0} \quad (12)$$

The value of  $R_L$  indicates the type of the isotherm; which is unfavourable ( $R_L > 1$ ), linear ( $R_L = 1$ ), favourable ( $0 < R_L < 1$ ) or irreversible ( $R_L = 0$ ).<sup>1</sup>

In Table S1  $R_L$  values for each used concentration are reported:

**Table S1.** Values of  $R_L$  at different concentrations

| $C_0$ | $R_L$ |
|-------|-------|
| 10    | 0.31  |
| 20    | 0.18  |
| 30    | 0.13  |
| 40    | 0.10  |
| 50    | 0.08  |
| 70    | 0.06  |
| 100   | 0.04  |
| 120   | 0.04  |
| 150   | 0.03  |

## References

<sup>1</sup> Kumari, S., Chauhan, G. S., Ahn, J.-H. *Chem. Eng.* 2016, **304**, 728.
